# Ovine Fetal Adrenal Synthesis of Cortisol: Regulation by Adrenocorticotropin, Angiotensin II and Transforming Growth Factor- $\beta$ \*

WILLIAM E. RAINEY, KUNIHICO OKA, RONALD R. MAGNESS, AND  
J. IAN MASON

*Departments of Obstetrics and Gynecology (W.E.R., R.R.M., J.I.M.), Pediatrics (R.R.M.), Biochemistry (J.I.M.), and The Cecil H. & Ida Green Center for Reproductive Biology Sciences (W.E.R., K.O., J.I.M.), University of Texas Southwestern Medical Center at Dallas, Dallas, Texas 75235-9032*

**ABSTRACT.** An increase in cortisol production by the fetal adrenal cortex is an important prepartum event. The increase in ovine fetal adrenal synthesis of cortisol appears to rely in part on the ACTH induction of  $17\alpha$ -hydroxylase cytochrome P-450 (P-450<sub>17 $\alpha$</sub> ) which occurs before parturition. In the present study we examined the effect of ACTH treatment on cortisol production and P-450<sub>17 $\alpha$</sub>  expression using primary cultures of ovine fetal adrenal cells. In addition, we examined the effects of angiotensin II (A-II) and transforming growth factor- $\beta$  (TGF $\beta$ ) on ACTH-treated cells. We have demonstrated previously that these factors modulate P-450<sub>17 $\alpha$</sub>  levels in adult ovine and bovine adrenal cells. Fetal ovine adrenal cells were isolated from 126- to 130-day fetuses (term =  $144 \pm 3$  days) and placed in monolayer cell culture. After 1 day in culture the cells were treated with ACTH (10 nM) with or without A-II (0.1–100 nM) or TGF $\beta$  (1–100 pM). Medium content of cortisol was low under basal conditions, whereas ACTH-stimulated cortisol production by 10- to

100-fold. A-II and TGF $\beta$  inhibited ACTH-induced cortisol production by 70–90%. In addition, 3 days of treatment with ACTH caused a greater than 10-fold induction of P-450<sub>17 $\alpha$</sub>  enzyme activity in fetal adrenal cells. A-II and TGF $\beta$  inhibited the ability of ACTH to induce P-450<sub>17 $\alpha$</sub>  activity by at least 75%. Using an antibody to P-450<sub>17 $\alpha$</sub>  and immunoblotting techniques the effects of ACTH, A-II, and TGF $\beta$  on enzyme activity were observed to correspond to cellular levels of P-450<sub>17 $\alpha$</sub>  protein. The inhibitory effects of TGF $\beta$  and A-II could not be overcome by the cAMP analog (Bu)<sub>2</sub>cAMP. Interestingly, the expression of the enzyme  $3\beta$ -hydroxysteroid dehydrogenase was much less sensitive to inhibition by A-II or TGF $\beta$ . The ability of A-II and TGF $\beta$  to suppress P-450<sub>17 $\alpha$</sub>  expression could play a role in determining the pathway of steroidogenesis and specifically the amount of cortisol produced by fetal adrenocortical cells *in vivo*. (*Endocrinology* 129: 1784–1790, 1991)

**I**N THE sheep fetus the prepartum surge in plasma cortisol levels is instrumental in the initiation of labor in this species (1, 2). The increase in cortisol may be involved in the maturation of several fetal organs which include the lung, adrenal, and intestine (3). The rise in fetal plasma cortisol appears to be associated with the rapid growth of the fetal adrenal glands (4–7), its greater sensitivity to ACTH (8, 9), as well as an increase in steroid-metabolizing enzymes (10–13). Although the identity of the factors causing the above changes in adrenal differentiation are not firmly established, ACTH appears to play a central role. Indeed, infusion of ACTH into the fetus *in vivo* will, after several days, increase fetal plasma cortisol levels (10–12). An immediate re-

sponse is not observed because the fetal adrenal cells must increase the levels of steroid-metabolizing enzymes. The enzyme  $17\alpha$ -hydroxylase cytochrome P-450 (P-450<sub>17 $\alpha$</sub> ), in particular, has been shown to be rate-limiting in the production of cortisol by the fetal sheep adrenal (11, 13).

In addition to a role for ACTH in causing differentiation, there also may be factors which inhibit the development of the adrenal and the subsequent rise in cortisol production. Such factors could be of particular importance in species such as the sheep, where an early rise in cortisol could lead to premature labor. Evidence is now accumulating which indicates that certain factors can inhibit the stimulatory effects of ACTH in adrenal cells. We, and others, have shown that two of these factors, angiotensin II (A-II) and transforming growth factor- $\beta$  (TGF $\beta$ ), can inhibit the ACTH stimulation of adult bovine and ovine adrenal cell cortisol production (14–19). Fetal sheep plasma levels of A-II are elevated when compared to the mother or nonpregnant adult levels (20, 21). In addition, it has been demonstrated that in the

Received May 6, 1991.

Address all correspondence and requests for reprints to: Dr. William E. Rainey, Department of Obstetrics and Gynecology, University of Texas Southwestern Medical Center, 5323 Harry Hines Boulevard, Dallas, Texas 75235-9032.

\* This project was supported in part by NIH Grant HD-11149 and American Heart Association Grant R1G-082.

mouse fetus expression of TGF $\beta$  is high (22). We hypothesize that these factors play a role in modulating fetal adrenal differentiated function. In the present study we use primary cultures of ovine fetal adrenal cells to examine the chronic regulation of cortisol production and the expression of P-450<sub>17 $\alpha$</sub> . We demonstrate that ACTH is a potent activator of both P-450<sub>17 $\alpha$</sub>  expression and cortisol production, whereas A-II and TGF $\beta$  can inhibit the stimulatory effects of ACTH.

## Materials and Methods

### Cell isolation and culture

Fetal ovine adrenals were obtained from 126- to 130-day (term = 144  $\pm$  3 days) twin or triplet fetuses obtained from sheep euthanized with 50 mg/kg sodium pentobarbital. The protocol for this nonsurvival surgery was approved by the Institutional Review Board for Animal Research at the University of Texas Southwestern Medical Center. Fetal ovine adrenocortical cells were prepared by successive treatments with trypsin (0.25%) in Dulbecco's modified Eagle's medium and Ham's nutrient mixture F12 (Sigma, St. Louis, MO) containing antibiotics as previously described. Cells were placed in monolayer culture for 24 h in the same medium containing insulin (6.25  $\mu$ g/ml), transferrin (6.25  $\mu$ g/ml), selenous acid (6.25 ng/ml), BSA (1.25 mg/ml), and linoleic acid (5.35  $\mu$ g/ml) added in the form of 1% ITS-plus Premix (Collaborative Research, Bedford, MA). Treatments were started on the second day of culture in this defined medium. Medium containing the various treatments were changed every 24 h until completion of the experiment. ACTH (Cortrosyn) was obtained from Organon (West Orange, NJ), A-II (human), saralasin, and (Bu)<sub>2</sub>cAMP from Sigma. Porcine TGF $\beta$ -1 was obtained from R&D Systems (Minneapolis, MN).

### Enzyme, steroid, and cAMP measurement

Steroid 17 $\alpha$ -hydroxylase activity was examined in intact cells by measuring the fractional conversion of [<sup>14</sup>C]progesterone (NEN-DuPont, Boston, MA) to 17 $\alpha$ -hydroxyprogesterone and deoxycortisol. Etomidate (1  $\mu$ M) was included in the incubation medium to inhibit 11 $\beta$ -hydroxylase activity, thereby preventing cortisol or corticosterone accumulation (16, 17). Cells were incubated for 2 h in medium containing approximately 30,000 dpm/ml [<sup>14</sup>C]progesterone and 20  $\mu$ M radioinert progesterone. The medium (1 ml) was then extracted with methylene chloride (10 ml). The extracts were dried under a stream of nitrogen. TLC analysis was accomplished using Silica Gel 60 F254 plastic-backed plates (EM Science, Gibbstown, NJ), which were developed using chloroform-ethylacetate (9:1 vol/vol). Progesterone, 17 $\alpha$ -hydroxyprogesterone, deoxycorticosterone, corticosterone, deoxycortisol, cortisol, and androstenedione were used as chromatographic standards. Steroid 17 $\alpha$ -hydroxylase activity was expressed as nanomoles of 17 $\alpha$ -hydroxyprogesterone plus deoxycortisol produced per mg cell protein in 2 h.

### Protein immunoblotting

After treatments, cells were washed with 0.9% NaCl solution and removed in a small vol of lysing buffer as previously

described (16, 17). One-dimensional electrophoresis was performed in a 12% polyacrylamide gel using a Precast gel system obtained from Amersham (Arlington Heights, IL). Sample buffer contained 0.05 M Tris (pH 6.8), 2% sodium dodecyl sulfate, 10% glycerol, and 8 mM EDTA, and samples were loaded after boiling for 3 min in the presence of 2-mercaptoethanol. Electrophoresis was carried out at 30 V at room temperature. Proteins were transferred to a nitrocellulose paper in a Transphor electrophoresis unit (Hoefer Scientific Instruments, San Francisco, CA), at 100 V for 1 h at 2–4 C in a buffer containing 20% methanol, 20 mM Tris, and 150 mM glycine. The nitrocellulose membrane was incubated for 15 min at room temperature in a blocking buffer containing 10 mM Tris, pH 7.4, 0.15 M NaCl, 0.2% Nonidet P-40, and 0.5% dry milk. The membranes were then placed in the same buffer containing polyclonal antibodies [10  $\mu$ g immunoglobulin G/ml against human placental 3 $\beta$ -hydroxysteroid dehydrogenase (3 $\beta$ HSD) or pig testis P-450<sub>17 $\alpha$</sub> ] for 2 h. Membranes were washed in the same buffer, without antibody, for 15 min, and incubated in the blocking buffer containing approximately 10<sup>6</sup> cpm/ml [<sup>125</sup>I] protein A (ICN Biochemicals, Irvine, CA) for 30 min. Finally, the nitrocellulose membrane was washed in blocking buffer for 1 h before exposure to photographic film. All incubations and washings were performed at room temperature.

## Results

### Cortisol production

The effects of A-II and TGF $\beta$  on fetal ovine adrenal cell steroid production were determined by measuring medium content of cortisol. Fetal ovine adrenal cells were treated for 1–3 days with medium and factors renewed each day. ACTH (10 nM) treatment lead to an increase in cortisol release by up to 100-fold above basal levels (Fig. 1 and Table 1). ACTH stimulation of cortisol production exhibited a progressive increase with each day of treatment. Treatment of fetal adrenal cells with A-II (100 nM) did not increase cortisol release above basal values (Table 1). However, when A-II was included with ACTH in the experimental medium, the amount of cortisol production was inhibited on each of the 3 days examined (Fig. 1). Relative A-II inhibition was greatest on day 1 ( $\approx$ 96%) with decreased effectiveness by the second ( $\approx$ 84%) and third days of treatment ( $\approx$ 62%). A-II inhibition of cortisol production occurred in a concentration-dependent manner (Fig. 2). The inhibition of cortisol production was readily observed at a concentration of 1 nM A-II, whereas maximal inhibition was seen at doses of 10 nM or higher. The effect of A-II was specific since the A-II antagonist, saralasin (10–1000 nM), was able to overcome the inhibitory effects of A-II (100 nM) in a dose-dependent fashion (Fig. 3). Saralasin by itself did not stimulate or inhibit cortisol secretion (data not shown). In addition, the inhibitory effect of A-II on cortisol production was seen when (Bu)<sub>2</sub>cAMP (1 mM) was used to stimulate cortisol production (Table 1).

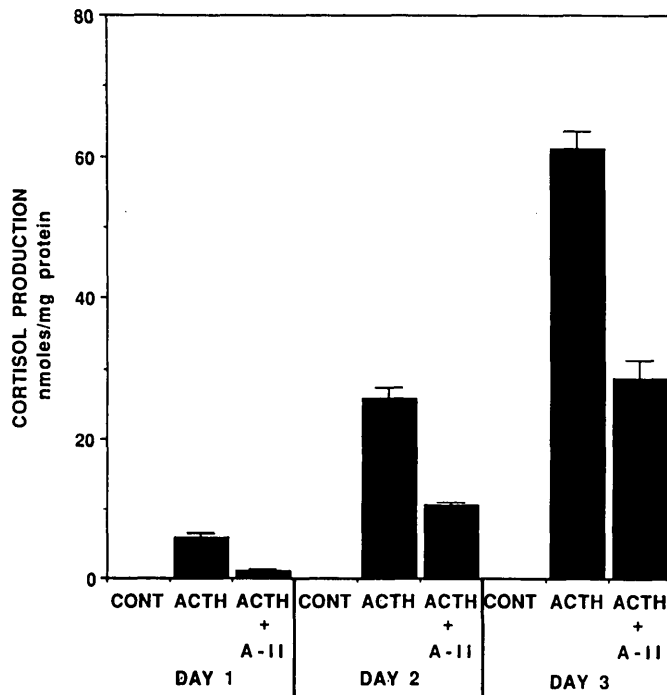

FIG. 1. The effect of A-II on ACTH stimulation of fetal adrenal cortisol production. Fetal adrenal cells were treated for 3 days in the absence or presence of ACTH (10 nM) and A-II (100 nM). Medium and factors were changed each day. Values represent the mean  $\pm$  SD for four dishes of cells and are representative of three independent experiments.

TABLE 1. Regulation of cortisol production in fetal ovine adrenal cells

| Treatment                   | Cortisol production (nmol/mg protein $\cdot$ 24 h) |                 |                     |
|-----------------------------|----------------------------------------------------|-----------------|---------------------|
|                             | None                                               | A-II (100 nM)   | TGF $\beta$ (80 pM) |
| Basal                       | 0.34 $\pm$ 0.05                                    | 0.43 $\pm$ 0.16 | 0.20 $\pm$ 0.04     |
| ACTH (10 nM)                | 16.22 $\pm$ 1.98                                   | 3.74 $\pm$ 0.40 | 4.45 $\pm$ 0.18     |
| Bu <sub>2</sub> cAMP (1 mM) | 10.28 $\pm$ 1.09                                   | 3.13 $\pm$ 0.49 | 2.90 $\pm$ 0.54     |

Fetal ovine adrenal cells were rinsed and treated as described in a defined medium for 24 h. Medium content of cortisol was determined by immunoassay and standardized to the amount of cellular protein. Values represent the mean  $\pm$  SD for four different dishes of cells.

Similar experiments to those described above were carried out to examine the effects of TGF $\beta$  on fetal adrenal cortisol production. Treatment of fetal adrenal cells with TGF $\beta$  (80 pM) decreased the already low level of cortisol production (Table 1). In addition, TGF $\beta$  almost completely inhibited the ability of ACTH to stimulate cortisol production during the 3-day treatment period (Fig. 4). The inhibitory effect of TGF $\beta$  on the production of cortisol was concentration dependent (Fig. 5). An inhibition of cortisol production was observed using a concentration of 1 pM TGF $\beta$ , whereas maximal inhibition was seen between 10–40 pM. At the higher concentrations, TGF $\beta$  (40–100 pM) inhibited ACTH-stimulated cortisol production by 70–90%. (Bu)<sub>2</sub>cAMP stimulation of cortisol production was inhibited by TGF $\beta$  in a similar manner (Table 1).

### Steroid 17 $\alpha$ -hydroxylase activity

To determine the effect of A-II and TGF $\beta$  on fetal ovine adrenal cell activity of P-450<sub>17 $\alpha$</sub> , we examined the fractional conversion of [<sup>14</sup>C]progesterone to 17 $\alpha$ -hydroxyprogesterone and deoxycortisol. Treatment of cells with ACTH for 3 days increased the amount of P-450<sub>17 $\alpha$</sub>  activity by more than 10-fold (Fig. 6). This increase in enzyme activity could be mimicked by substituting (Bu)<sub>2</sub>cAMP (1 mM) for ACTH. A-II (100 nM) inhibited the ability of ACTH and (Bu)<sub>2</sub>cAMP to induce P-450<sub>17 $\alpha$</sub>  activity by greater than 75%. If TGF $\beta$  (80 pM) was included in the experimental medium with either ACTH or (Bu)<sub>2</sub>cAMP the induction of P-450<sub>17 $\alpha$</sub>  was also abolished (Fig. 6).

### P-450<sub>17 $\alpha$</sub> enzyme levels

To examine the effect of ACTH, A-II, and TGF $\beta$  on the cellular content of P-450<sub>17 $\alpha$</sub>  enzyme, aliquots of cell protein were subjected to sodium dodecyl sulfate-polyacrylamide gel electrophoresis, and P-450<sub>17 $\alpha$</sub>  was visualized after immunoblotting. The level of P-450<sub>17 $\alpha$</sub>  in untreated cells was undetectable, whereas ACTH treatment for 3 days caused the appearance of a prominent band with an approximate mol wt of 57K (Fig. 7). A-II (1–1000 nM) decreased the amount of this immunoreactive band in a dose-dependent manner. Concentrations of A-II greater than 10 nM almost completely blocked the ability of ACTH to induce P-450<sub>17 $\alpha$</sub>  expression. In addition, we examined the level of the steroid-metabolizing enzyme 3 $\beta$ HSD. ACTH increased the amount of immunodetectable 3 $\beta$ HSD severalfold (Fig. 7). When A-II was included in the incubation medium with ACTH, the induction of 3 $\beta$ HSD was blunted but not to the degree seen for P-450<sub>17 $\alpha$</sub> . TGF $\beta$  was also able to inhibit the ACTH-induction of P-450<sub>17 $\alpha$</sub>  enzyme levels (Fig. 8). The inhibitory effects of TGF $\beta$  occurred in a concentration-dependent manner with concentrations 40 and 100 pM inhibiting P-450<sub>17 $\alpha$</sub>  expression to nearly nondetectable levels. The induction of 3 $\beta$ HSD levels were also decreased by TGF $\beta$  (Fig. 8), but not to the extent seen for P-450<sub>17 $\alpha$</sub> .

### Discussion

The adrenal glands of the ovine fetus follow an interesting course of biochemical development. By 50 days of a 144-day gestation the ovine fetal adrenal appears functional by the ability to produce cortisol and by its responsiveness to ACTH treatment. Interestingly, responsiveness to ACTH and the production of cortisol are decreased by day 100 of gestation but return by term (9). The ability to produce cortisol appears to follow P-450<sub>17 $\alpha$</sub>  expression within the fetal adrenal (10–13). The present study demonstrates that ACTH is a potent activator of

FIG. 2. Concentration dependency of A-II inhibition. Fetal adrenal cells were treated for 24 h alone or with ACTH (10 nM) and increasing concentrations of A-II. Values represent the mean  $\pm$  SD for cortisol content of the medium from four separate dishes of cells and are representative of three independent experiments.

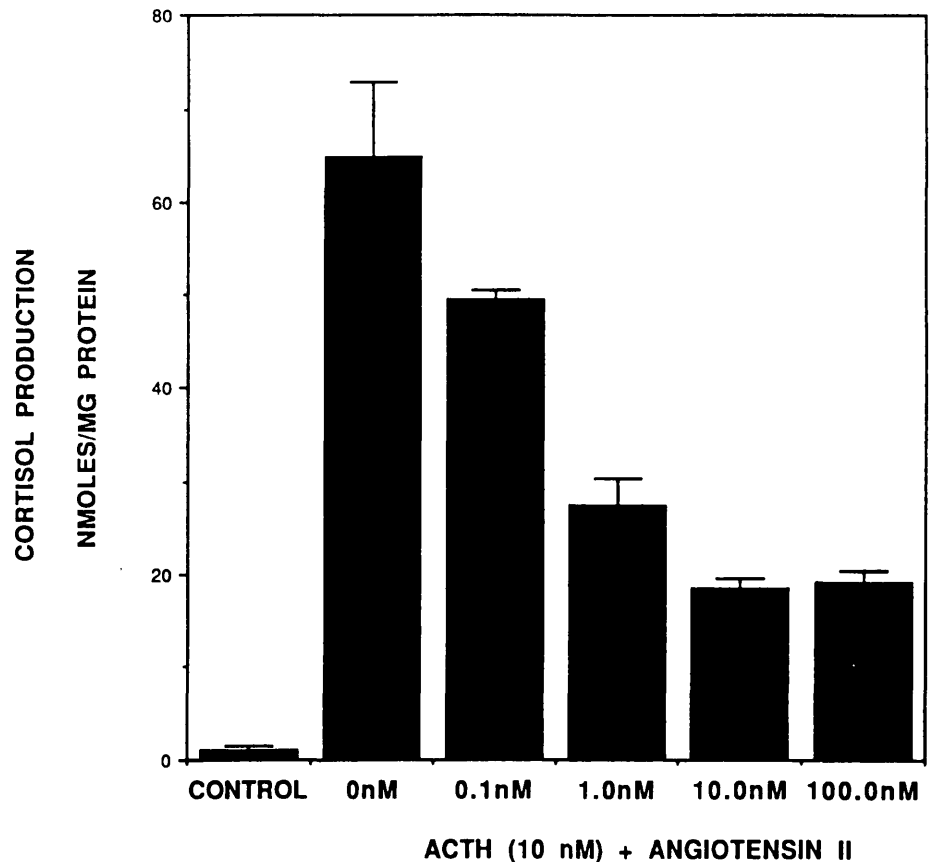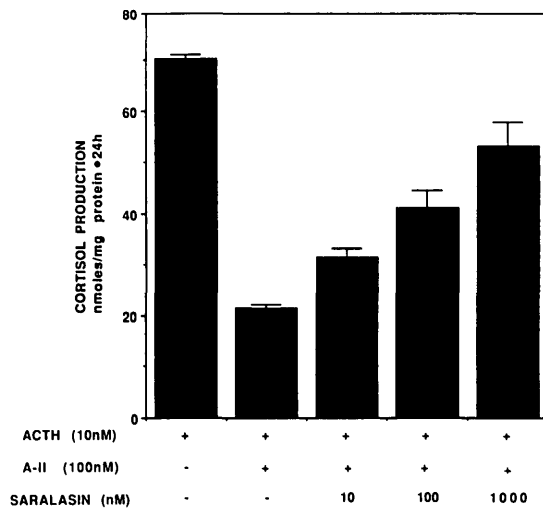

FIG. 3. Effect of saralasin on A-II inhibition. Fetal adrenal cells were treated for 24 h in the absence or presence of ACTH (10 nM), A-II (100 nM), and increasing concentrations of the A-II antagonist, saralasin. Values represent the mean  $\pm$  SD for cortisol content of the medium from four separate dishes of cells.

P-450<sub>17 $\alpha$</sub>  expression and cortisol production in ovine fetal adrenal cells *in vitro*. In addition, we show that A-II and TGF $\beta$  are able to inhibit the ability of ACTH to induce both cortisol production and P-450<sub>17 $\alpha$</sub>  expression.

Both *in vitro* and *in vivo* studies have shown that ovine

fetal adrenal maturation is induced by ACTH administration (10–12). ACTH increases the coupling of the ACTH receptor to adenylate cyclase resulting in a stimulation of cAMP production by the fetal adrenal cells (8, 9). ACTH treatment *in vitro* and *in vivo* also increases P-450<sub>17 $\alpha$</sub>  expression (10–12). Our data extends the previous reports by examining the ability of ACTH to induce the levels of P-450<sub>17 $\alpha$</sub>  and 3 $\beta$ HSD protein in fetal sheep adrenal cells. The level of P-450<sub>17 $\alpha$</sub>  protein paralleled the ACTH effect on P-450<sub>17 $\alpha$</sub>  activity. Therefore, fetal sheep adrenal cells increase expression of P-450<sub>17 $\alpha$</sub>  and 3 $\beta$ HSD protein presumably via an increase in messenger RNA accumulation, a manner similar to that we have seen in adult bovine and ovine adrenal cells (17, 23).

In addition to the potent stimulatory action of ACTH, it has been suggested that in the sheep fetus there are endogenous inhibitors of adrenal differentiation. This hypothesis is based on the observation that when placed in primary culture, ovine fetal adrenal cells spontaneously exhibit increased responsiveness to ACTH and steroidogenic capacity (10). Using adult bovine and ovine adrenal cells in primary culture, we recently demonstrated that A-II and TGF $\beta$  are potent inhibitors of cortisol production (16–17). TGF $\beta$  appears to affect adrenal cell function at several sites beginning with a rapid suppression of steroid production which occurs during

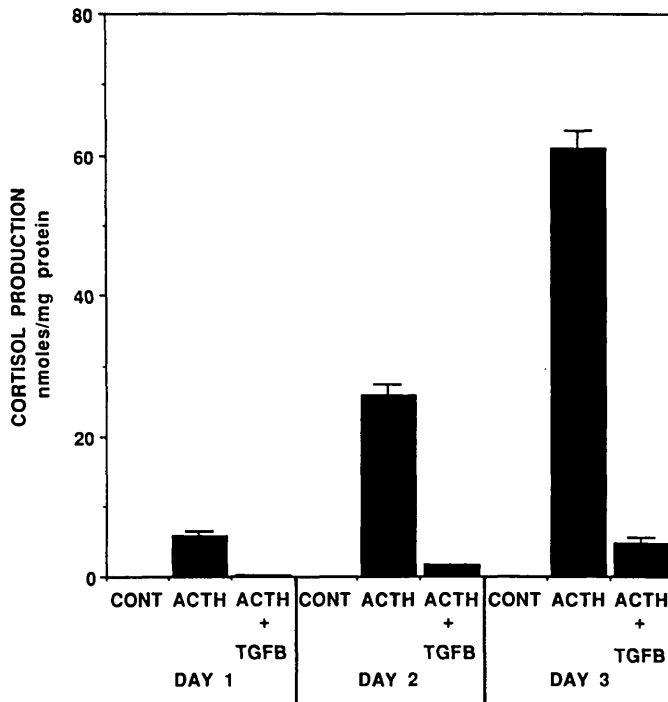

FIG. 4. The effect of TGF $\beta$  on ACTH stimulation of fetal adrenal cortisol production. Fetal adrenal cells were treated for 3 days in the absence or presence of ACTH (10 nM) and TGF $\beta$  (80 pM). Medium and factors were changed each day. Values represent the mean  $\pm$  SD for four dishes of cells and are representative of three independent experiments.

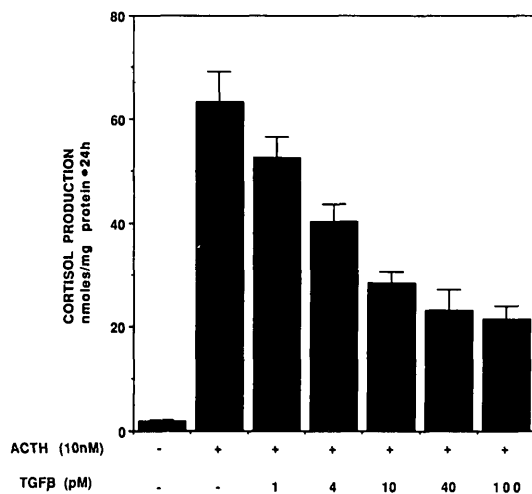

FIG. 5. Concentration dependency of TGF $\beta$  inhibition of cortisol production. Fetal adrenal cells were treated for 24 h alone or with ACTH (10 nM) and increasing concentrations of TGF $\beta$ . Values represent the mean  $\pm$  SD for cortisol content of the medium from four different dishes of cells.

the initial 12 h of TGF $\beta$  treatment. Chronic treatment with TGF $\beta$  also decreases ACTH and low density lipoprotein (LDL) receptor number as well as expression of steroid-metabolizing enzymes (14, 16–18). In the current study, we show that both A-II and TGF $\beta$  are able to inhibit the majority of cortisol production within the

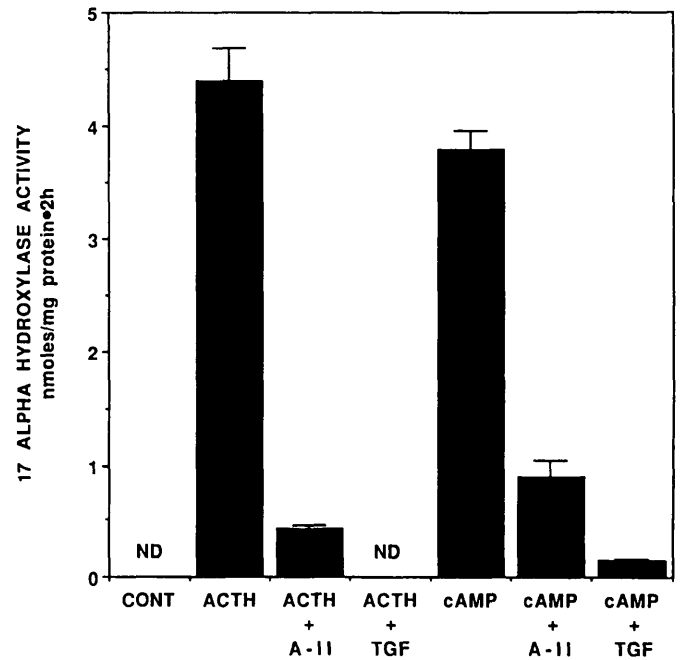

FIG. 6. Regulation of fetal adrenal cell steroid 17 $\alpha$ -hydroxylase activity. Cells were treated for 3 days in the absence or presence of ACTH (10 nM), A-II (100 nM), TGF $\beta$  (80 pM), and (Bu) $_2$ cAMP (cAMP 1 mM). At the end of treatment cellular 17 $\alpha$ -hydroxylase activity was examined. Values represent the mean  $\pm$  SD for triplicate samples from a representative experiment. ND, Nondetectable.

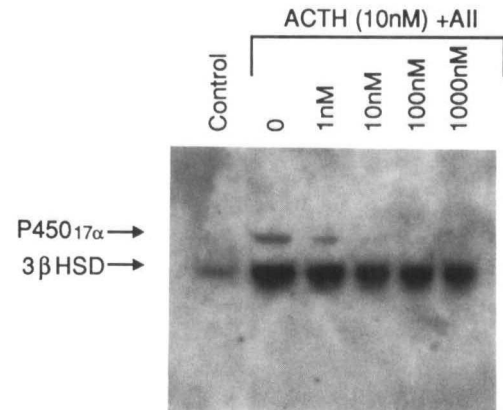

FIG. 7. Regulation of P-450 $_{17\alpha}$  and 3 $\beta$ HSD protein expression by A-II. Cells were treated for 3 days in the absence or presence of ACTH (10 nM) and increasing concentrations of A-II. At the end of treatment 75  $\mu$ g total cell protein was used for immunoblotting analysis.

first 24 h of treatment. The inhibition of cortisol production was not due to its effects on the use of low density lipoprotein cholesterol since all experiments were conducted in a defined medium which was lipoprotein-free. In addition, the inhibition of (Bu) $_2$ cAMP-stimulated cortisol production suggests that an effect of TGF $\beta$  on fetal adrenal cell ACTH receptors also was not solely responsible. Thus, like in the adult ovine and bovine adrenal, TGF $\beta$  appeared to act at multiple levels within the cell.

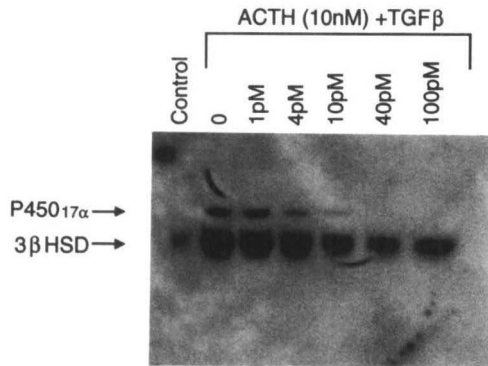

FIG. 8. Regulation of P-450<sub>17 $\alpha$</sub>  and 3 $\beta$ HSD protein expression by TGF $\beta$ . Fetal adrenal cells were treated for 3 days in the absence or presence of ACTH (10 nM) and increasing concentrations of TGF $\beta$ . At the end of treatment 75  $\mu$ g total cell protein was used for immunoblotting analysis.

Another chronic effect of A-II and TGF $\beta$  on cultures of ovine fetal adrenal cells was the inhibition of ACTH expression of P-450<sub>17 $\alpha$</sub>  and 3 $\beta$ HSD. Importantly the expression of P-450<sub>17 $\alpha$</sub>  was decreased to a greater degree. These data suggest that differential regulation in the expression of these enzymes may occur. Such a case has been observed in human fetal adrenal (19) and adult bovine adrenal cells (18). The differences in these enzymes are of particular importance when one considers the adrenal zones and the secretion of zone-specific steroids. We recently have shown that ovine fetal adrenal cells are capable of producing aldosterone in response to A-II (24). The ability of A-II to inhibit expression of P-450<sub>17 $\alpha$</sub>  and increase aldosterone production furthers the hypothesis that this hormone is involved in the regulation of adrenal zonation.

Although the inhibitory effects of TGF $\beta$  and A-II appear similar in the fetal adrenal cells, the reported intracellular mechanism of action for these peptides does not seem to be the same. In adult adrenal cells A-II activates the hydrolysis of membrane phospholipids yielding the two second messengers diacylglycerol and inositol trisphosphate. Diacylglycerol proceeds to activate protein kinase C, and inositol trisphosphate causes the release of intracellular calcium stores (reviewed in Ref. 25). The activation of protein kinase C by A-II appears to be responsible for the inhibition of P-450<sub>17 $\alpha$</sub>  expression in fetal human adrenal cells and adult bovine adrenal cells (18, 19). The exact intracellular mechanism of action for TGF $\beta$  is not currently known.

The regulatory role of A-II or TGF $\beta$  in the fetus is not fully defined. However, levels of A-II circulating in the fetus are greater than in the maternal or nonpregnant sheep circulation (20–21). It is possible that levels of A-II are involved with the development of the renin-angiotensin system and could play a role in initiating adrenal aldosterone production (26). Data in the present study

would suggest that the renin-angiotensin system may be involved in a negative modulation of cortisol levels acting directly on adrenal differentiation. The mechanism by which ACTH would overcome the inhibitory effects of A-II and cause the parturition surge in cortisol remains to be addressed. However, the magnitude of the rise in plasma ACTH levels near term could be involved with decreasing A-II effectiveness.

In conclusion, the results show that ACTH stimulates the production of cortisol and expression of P-450<sub>17 $\alpha$</sub>  protein. The data also show that the ACTH stimulation of fetal adrenal cell cortisol production can be inhibited by A-II and TGF $\beta$ . Furthermore, the inhibitory effects of both A-II and TGF $\beta$  were manifest at the level of P-450<sub>17 $\alpha$</sub>  expression. These findings provide insight into the mechanisms involved in causing the cortisol surge seen in late gestation within the ovine fetus. In addition, we suggest that A-II and/or TGF $\beta$  may be instrumental in preventing a premature increase in cortisol production by the ovine fetal adrenal.

### Acknowledgments

We appreciate the technical assistance of Nora Cline and the excellent secretarial assistance of E. Ann Whisenand.

### References

- Liggins GC, Fairclough RJ, Grieves SA, Kendall JZ, Knox BS 1973 The mechanism of parturition in the ewe. *Recent Prog Horm Res* 29:111–150
- Mason JI, France JT, Magness RR, Murry BA, Rosenfeld CR 1987 Ovine placental steroid 17 $\alpha$ -hydroxylase, aromatase and sulphatase in dexamethasone-induced and natural parturition. *J Endocrinol* 122:351–359
- Liggins GC 1976 Adrenocortical-related maturational events in the fetus. *Am J Obstet Gynecol* 126:931–941
- Boshier DP, Holloway H, Liggins GC 1980 Growth and cytodifferentiation of the fetal lamb adrenal cortex prior to parturition. *J Anat* 130:97–111
- Coulter CL, Young IR, Browne CA, McMillen IC 1989 Effect of hypophysectomy on the growth and development of the sheep adrenal gland: a morphometric study. *Acta Endocrinol (Copenh)* 120:301–307
- Thorburn GD, Challis JRG 1979 Endocrine control of parturition. *Physiol Rev* 59:863–918
- Robinson PM, Rowe EJ, Wintour EM 1979 The histogenesis of the adrenal cortex in the foetal sheep. *Acta Endocrinol (Copenh)* 91:134–149
- Durand P 1979 ACTH receptor levels in lamb adrenals at late gestation and early neonatal stages. *Biol Reprod* 20:837–845
- Manchester L, Challis JRG 1982 The effects of adrenocorticotropin, guanylylimidodiphosphate, dibutyryl adenosine 3',5'-monophosphate, and exogenous substrates on corticosteroid output by ovine fetal adrenal cells at different times in pregnancy. *Endocrinology* 3:889–895
- Durand P, Cathiard AM, Locatelli A, Saez JM 1982 Modifications of the steroidogenic pathway during spontaneous and adrenocorticotropin-induced maturation of ovine fetal adrenal. *Endocrinology* 110:500–505
- Durand P, Cathiard A-M, Saez JM 1984 *In vitro* maturation of steroidogenic capacity of ovine fetal and neonatal adrenal cells. *Endocrinology* 114:1128–1134
- Tangalakis K, Coghlan JP, Crawford R, Hammond VE, Wintour

- EM 1990 Steroid hydroxylase gene expression in the ovine fetal adrenal gland following ACTH infusion. *Acta Endocrinol (Copenh)* 123:371-377
12. Manchester L, Lye SJ, Challis JRG 1983 Activation of ovine fetal adrenal function by pulsatile or continuous administration of adrenocorticotropin-(1-24). II. Effects on adrenal cell responses *in vitro*. *Endocrinology* 113:777-782
  13. John ME, Simpson ER, Carr BR, Magness RR, Rosenfeld CR, Waterman MR, Mason JI 1987 Ontogeny of steroid hydroxylases: evidence for cAMP-independent gene expression. *Mol Cell Endocrinol* 50:263-268
  14. Hotta M, Baird A 1987 The inhibition of low density lipoprotein metabolism by transforming growth factor- $\beta$  mediates its effects on steroidogenesis in bovine adrenocortical cells *in vitro*. *Endocrinology* 121:150-159
  15. Feige JJ, Cochet C, Rainey WE, Madani C, Chambaz EM 1987 Type  $\beta$  transforming growth factor affects adrenocortical cell-differentiated functions. *J Biol Chem* 262:13941-13945
  16. Rainey WE, Viard I, Mason JI, Cochet C, Chambaz EM, Saez JM 1988 Effects of transforming growth factor beta on ovine adrenocortical cells. *Mol Cell Endocrinol* 60:189-198
  17. Rainey WE, Naville D, Saez JM, Carr BR, Byrd W, Magness RR, Mason JI 1990 Transforming growth factor- $\beta$  inhibits steroid  $17\alpha$ -hydroxylase cytochrome P-450 expression in ovine adrenocortical cells. *Endocrinology* 127:1910-1915
  18. Rainey WE, Naville D, Mason JI 1991 Regulation of  $3\beta$ -hydroxysteroid dehydrogenase in adrenocortical cells: effects of angiotensin-II and transforming growth factor beta. *Endocr Res* 17:281-296
  19. McAllister JM, Hornsby PJ 1988 Dual regulation of  $3\beta$ -hydroxysteroid dehydrogenase,  $17\alpha$ -hydroxylase, and dehydroepiandrosterone sulfotransferase by adenosine 3',5'-monophosphate and activators of protein kinase C in cultured human adrenocortical cells. *Endocrinology* 122:2012-2018
  20. Naden RP, Coultrup S, Arant BS, Rosenfeld CR 1985 Metabolic clearance of angiotensin II in pregnant and nonpregnant sheep. *Am J Physiol* 249:E49-E55
  21. Rosenfeld CR, Magness RR, Durham DL, Shaul PW 1991 Ontogeny of vascular smooth muscle receptors (VSMR) for angiotensin II (A-II) in ovine fetal aorta and placental arteries and maternal uterine arteries. *Pediatr Res* 29:24 (Abstract)
  22. Thompson NL, Flanders KC, Smith JM, Ellingsworth LR, Roberts AB, Sporn MB 1989 Expression of transforming growth factor-beta 1 in specific cells and tissues of adult and neonatal mice. *J Cell Biol* 108:661-669
  23. Zuber MX, John ME, Okamura T, Simpson ER, Waterman MR 1986 Bovine adrenocortical cytochrome P-450 $_{17\alpha}$ : regulation of gene expression by ACTH and elucidation of primary sequence. *J Biol Chem* 261:2475-2482
  24. Rainey WE, Magness RR, Carr BR, Chronic stimulation of aldosterone production in fetal ovine adrenal cells by angiotensin II. Program of the 73rd Annual Meeting of The Endocrine Society, Washington, DC, 1991 (Abstract 164)
  25. Bird IM, Walker SW, Williams BC 1990 Agonist-stimulated turnover of the phosphoinositides and the regulation of adrenocortical steroidogenesis. *J Mol Endocrinol* 5:191-209
  26. Robillard JE, Gomez RA, VanOrden D, Smith Jr FG 1982 Comparison of the adrenal and renal responses to angiotensin II in fetal lambs and adult sheep. *Circ Res* 50:140-147
